# Supplementary material for: Models of SIV rebound after treatment interruption that involve multiple reactivation events
Source: PubMed Central journal article supplement (PMC7529301; doi:10.1371/journal.pcbi.1008241), 2020-10-01
Supplement: pcbi.1008241.s006.pdf [file pcbi.1008241.s006.pdf]

A

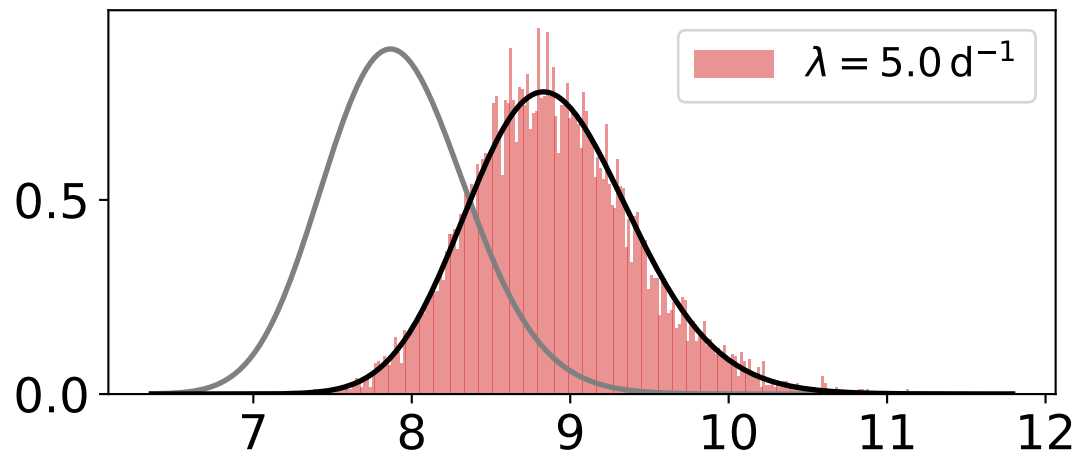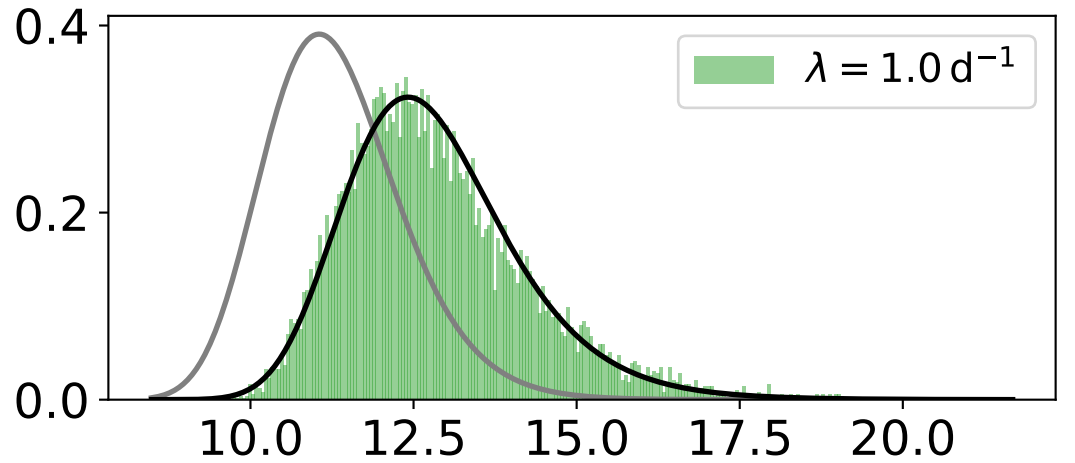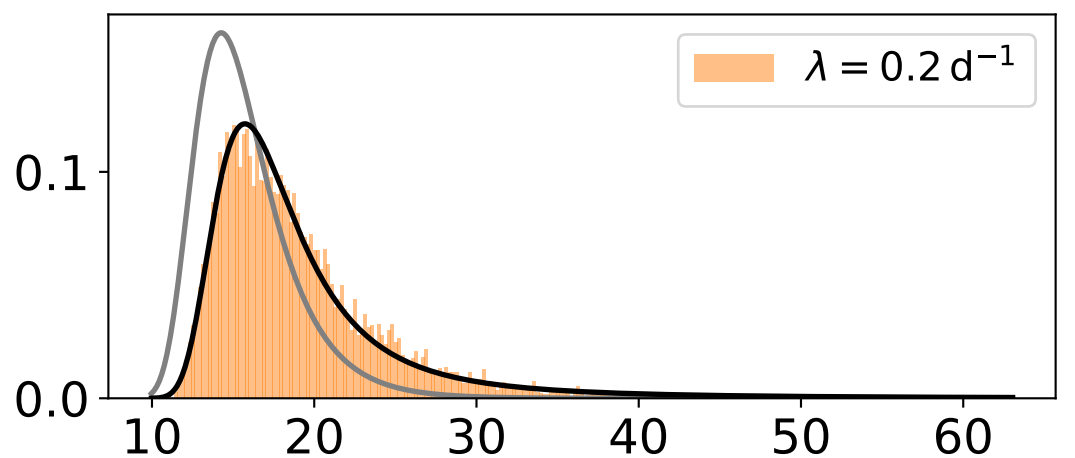

B

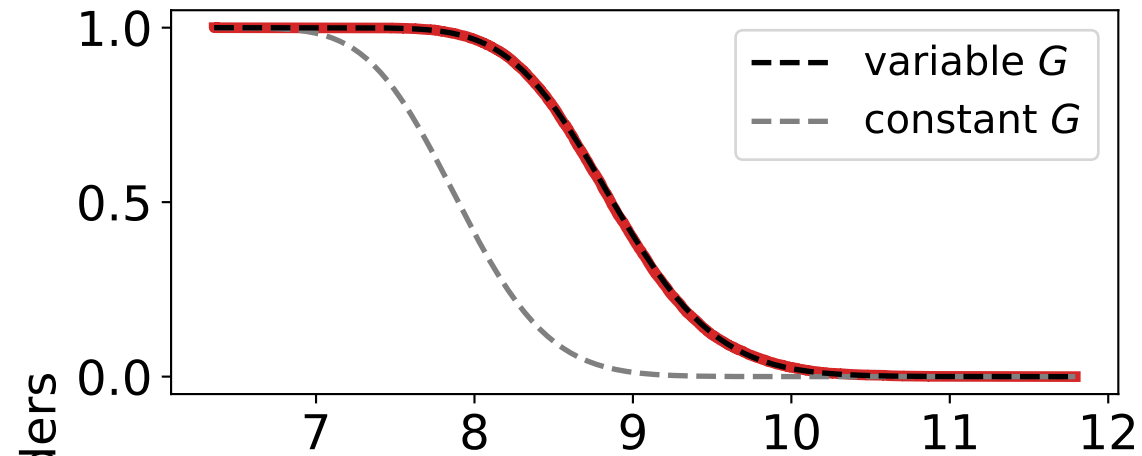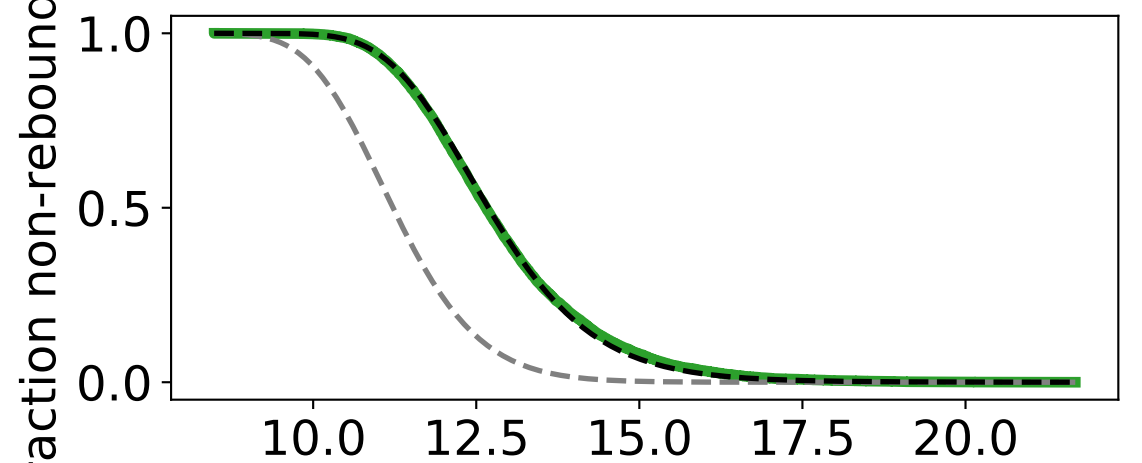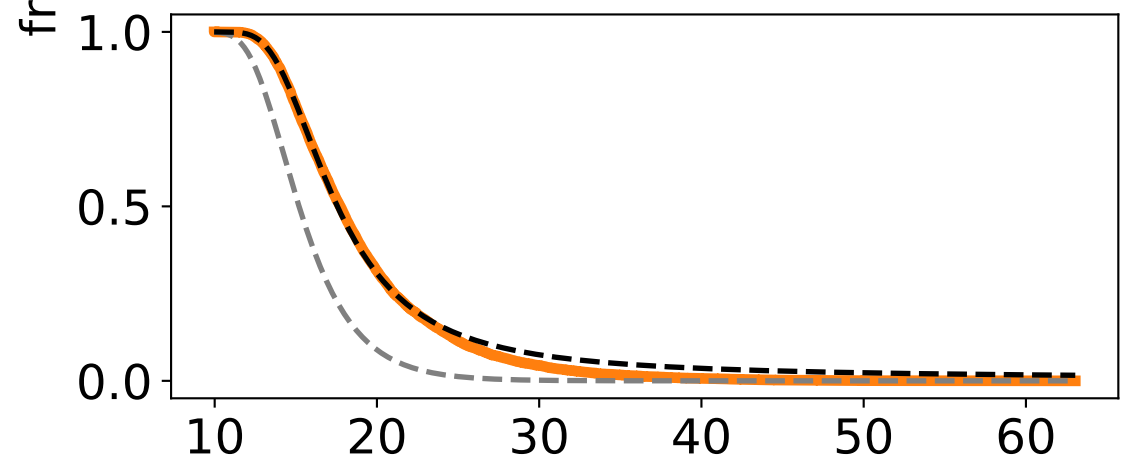

time to detection (days)
