# Supplementary material for: Models of SIV rebound after treatment interruption that involve multiple reactivation events
Source: PubMed Central journal article supplement (PMC7529301; doi:10.1371/journal.pcbi.1008241), 2020-10-01
Supplement: pcbi.1008241.s008.pdf [file pcbi.1008241.s008.pdf]

|                                    |                                | <i>rebound</i>         |                | <i>acute</i>                 |                   |                        |              |
|------------------------------------|--------------------------------|------------------------|----------------|------------------------------|-------------------|------------------------|--------------|
| <i>population-level parameters</i> |                                |                        |                |                              |                   |                        |              |
| symbol                             | unit                           | mode                   | 95% CrI        |                              |                   |                        |              |
| $\alpha_g$                         | $\log d^{-1}$                  | -0.48                  | [-0.95, -0.18] |                              |                   |                        |              |
| $\alpha_\lambda$                   | $\log d^{-1}$                  | 1.47                   | [0.73, 2.10]   |                              |                   |                        |              |
| $\mu_g$                            | $\log d^{-1}$                  | -0.24                  | [-0.52, 0.52]  |                              | 0.67 [0.58, 0.79] |                        |              |
| $\mu_\lambda$                      | $\log d^{-1}$                  | -0.93                  | [-1.65, -0.01] |                              |                   |                        |              |
| $\sigma_g$                         | $\log d^{-1}$                  | 0.63                   | [0.44, 1.33]   |                              | 0.05 [0.01, 0.27] |                        |              |
| $\sigma_\lambda$                   | $\log d^{-1}$                  | 0.12                   | [0.02, 0.95]   |                              |                   |                        |              |
| $v_0$                              | copies mL <sup>-1</sup>        | 0.36                   | [0.11, 1.89]   |                              |                   |                        |              |
| $\sigma$                           | $\log$ copies mL <sup>-1</sup> | 1.28                   | [1.05, 1.63]   |                              | 0.80 [0.51, 1.12] |                        |              |
| <i>individual-level parameters</i> |                                |                        |                |                              |                   |                        |              |
| subject                            | start ART (d)                  | $g$ (d <sup>-1</sup> ) | 95% CrI        | $\lambda$ (d <sup>-1</sup> ) | 95% CrI           | $g$ (d <sup>-1</sup> ) | 95% CrI      |
| 6511                               | 1                              | 2.21                   | [1.24, 7.43]   | 0.07                         | [0.03, 0.19]      |                        |              |
| 6513                               | 2                              | 1.37                   | [0.85, 4.48]   | 0.10                         | [0.04, 0.30]      |                        |              |
| 6514                               | .                              | 1.30                   | [0.77, 4.62]   | 0.10                         | [0.04, 0.28]      |                        |              |
| 6517                               | .                              | 1.01                   | [0.44, 4.60]   | 0.08                         | [0.04, 0.20]      |                        |              |
| 5462                               | 3                              | 0.70                   | [0.42, 3.65]   | 0.13                         | [0.06, 0.31]      |                        |              |
| 5463                               | .                              | 0.27                   | [0.20, 0.43]   | 0.14                         | [0.07, 0.56]      |                        |              |
| 5471                               | .                              | 0.82                   | [0.56, 1.99]   | 0.13                         | [0.06, 0.35]      |                        |              |
| 5475                               | .                              | 0.42                   | [0.32, 0.63]   | 0.14                         | [0.06, 0.50]      |                        |              |
| 6518                               | .                              | 1.86                   | [1.09, 5.53]   | 0.12                         | [0.05, 0.29]      |                        |              |
| 6519                               | .                              | 0.56                   | [0.38, 2.88]   | 0.14                         | [0.06, 0.42]      | 1.95                   | [1.56, 2.59] |
| 6520                               | .                              | 1.19                   | [0.75, 4.05]   | 0.13                         | [0.06, 0.38]      |                        |              |
| 6521                               | .                              | 2.36                   | [1.32, 5.82]   | 0.13                         | [0.06, 0.32]      |                        |              |
| 6522                               | .                              | 1.34                   | [0.76, 5.33]   | 0.13                         | [0.06, 0.29]      |                        |              |
| 5477                               | 7                              | 0.56                   | [0.41, 0.74]   | 0.45                         | [0.21, 1.96]      | 1.98                   | [1.73, 2.65] |
| 5479                               | .                              | 0.67                   | [0.50, 1.31]   | 0.42                         | [0.19, 1.78]      | 1.97                   | [1.64, 2.34] |
| 5484                               | .                              | 0.65                   | [0.47, 0.94]   | 0.46                         | [0.21, 2.45]      | 2.02                   | [1.81, 2.97] |
| 5485                               | .                              | 0.65                   | [0.49, 1.18]   | 0.42                         | [0.18, 1.62]      | 1.93                   | [1.57, 2.22] |
| 5487                               | 10                             | 0.71                   | [0.54, 1.20]   | 0.92                         | [0.35, 4.96]      | 1.90                   | [1.60, 2.21] |
| 5488                               | .                              | 0.60                   | [0.46, 1.00]   | 0.93                         | [0.34, 5.94]      | 1.96                   | [1.71, 2.50] |
| 5489                               | .                              | 0.39                   | [0.26, 1.05]   | 1.38                         | [0.41, 12.64]     | 1.91                   | [1.55, 2.25] |
| 5491                               | .                              | 0.19                   | [0.09, 0.31]   | 0.88                         | [0.36, 5.01]      | 1.93                   | [1.62, 2.36] |
| 5504                               | 14                             | 0.23                   | [0.13, 0.35]   | 3.04                         | [0.76, 28.52]     | 2.00                   | [1.80, 2.72] |
| 5515                               | .                              | 0.43                   | [0.28, 0.66]   | 3.68                         | [0.79, 31.65]     | 1.97                   | [1.71, 2.30] |
| 5523                               | .                              | 0.56                   | [0.40, 0.85]   | 3.65                         | [0.78, 36.13]     | 1.97                   | [1.67, 2.28] |
| 5524                               | .                              | 0.45                   | [0.29, 0.67]   | 3.13                         | [0.63, 29.46]     | 1.90                   | [1.62, 2.17] |
