# Supplementary material for: Models of SIV rebound after treatment interruption that involve multiple reactivation events
Source: PubMed Central journal article supplement (PMC7529301; doi:10.1371/journal.pcbi.1008241), 2020-10-01
Supplement: pcbi.1008241.s009.pdf [file pcbi.1008241.s009.pdf]

| Model                             | WAIC  | ( $\pm$ SEM)  | $\Delta$ WAIC | ( $\pm$ SEM)  | $\hat{k}$ | ( $\pm$ SEM)  |
|-----------------------------------|-------|---------------|---------------|---------------|-----------|---------------|
| multiple-reactivation model (MRM) | 346.3 | ( $\pm 0.3$ ) | –             |               | 37.8      | ( $\pm 0.2$ ) |
| conditionally-deterministic MRM   | 348.4 | ( $\pm 0.4$ ) | 2.1           | ( $\pm 0.5$ ) | 38.2      | ( $\pm 0.3$ ) |
| single-reactivation model         | 357.8 | ( $\pm 0.7$ ) | 11.5          | ( $\pm 0.8$ ) | 42.3      | ( $\pm 0.4$ ) |
